# Supplementary material for: The planarian wound epidermis gene equinox is required for blastema formation in regeneration
Source: Nat Commun. 2022 May 18;13:2726. doi: 10.1038/s41467-022-30412-6 (PMC9117669; doi:10.1038/s41467-022-30412-6)
Supplement: Supplementary file 1 — Supplementary Information [file 41467_2022_30412_MOESM1_ESM.pdf]

**The planarian wound epidermis gene *equinox* is required for blastema formation in regeneration**

M. Lucila Scimone<sup>1,2,†</sup>, Jennifer K. Cloutier<sup>2,3,4,†</sup>, Chloe L. Maybrun<sup>2,3</sup>, and Peter W. Reddien<sup>1,2,3,\*</sup>

*Nature Communications*

**Supplementary Information**

Supplementary Figures 1-14  
Supplementary Data 1-3

## **Supplementary Data**

**Supplementary Data 1. Differential expression analysis of regenerating control and *bmp4* RNAi animals.**

**Supplementary Data 2. Accession numbers of proteins with similar structure analyzed in the phylogenetic tree.**

**Supplementary Data 3. Differential expression analysis of regenerating control and *equinox* RNAi animals.**

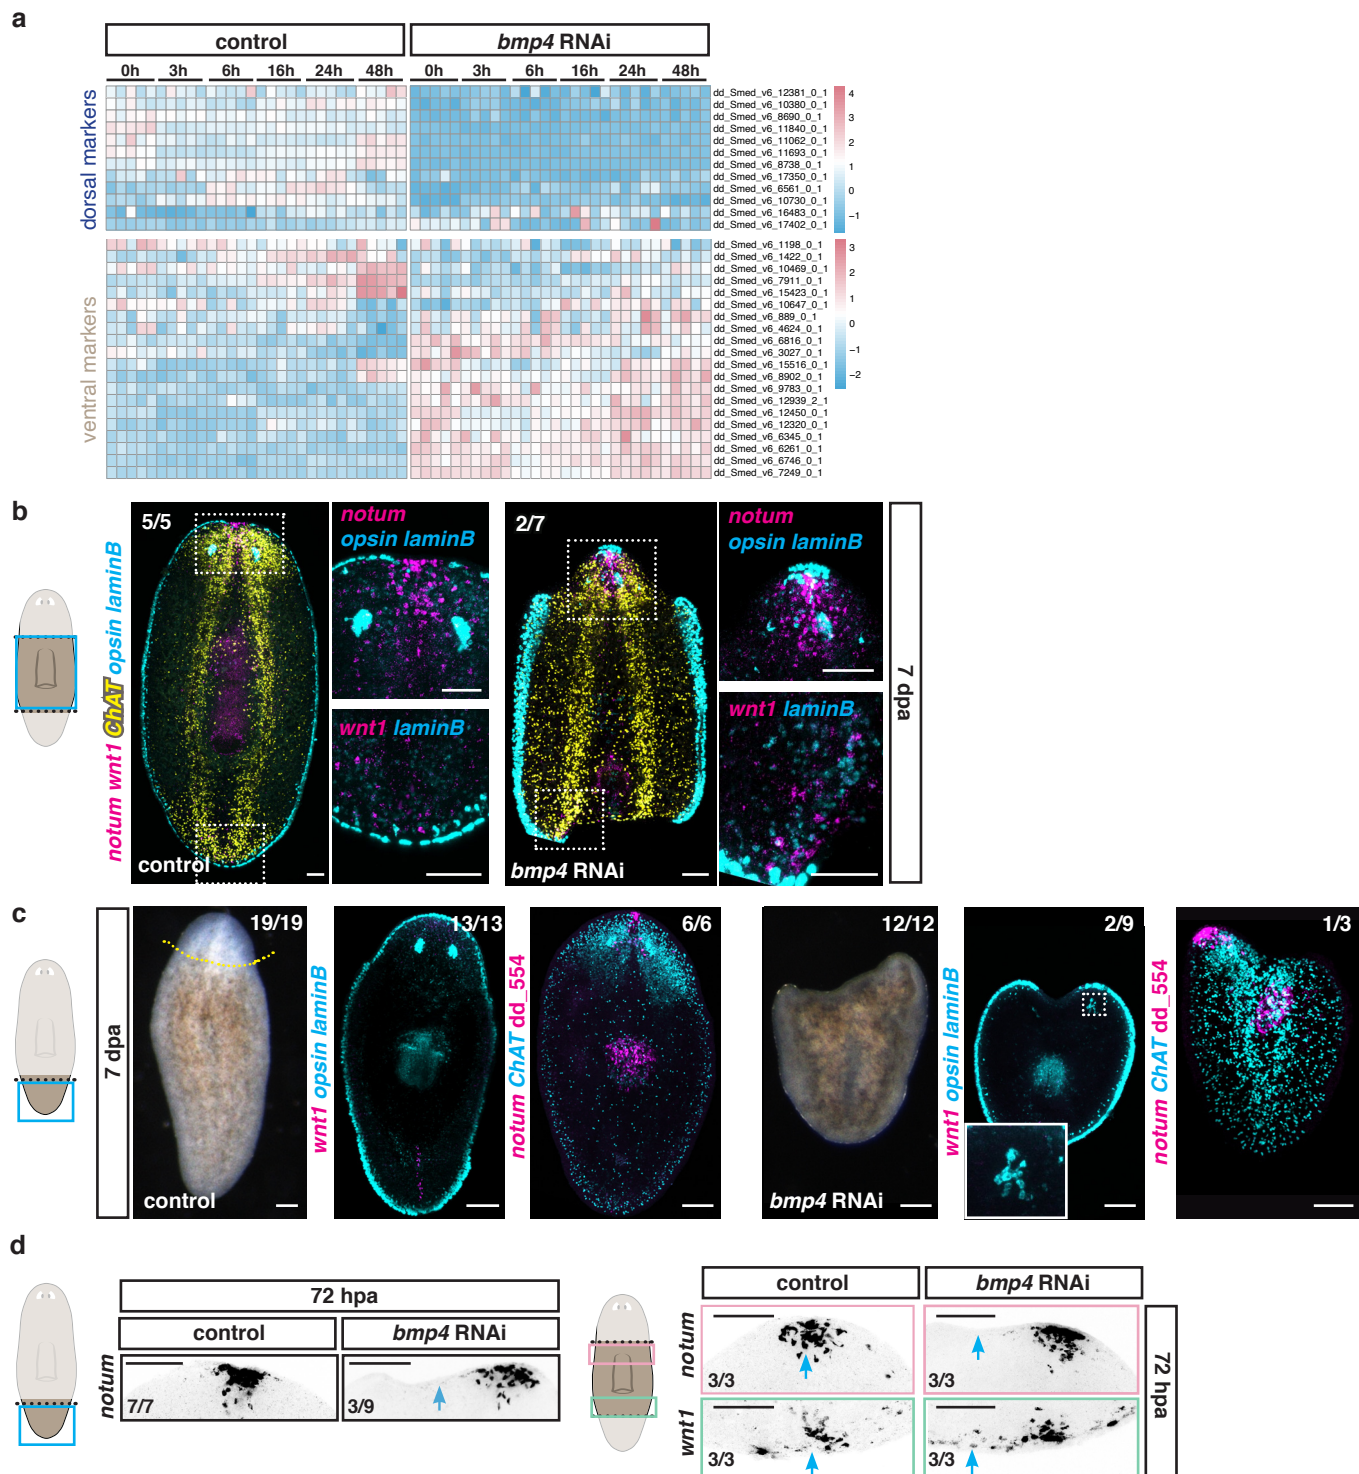

Figure S1

**Supplementary Figure 1. *bmp4* is required for planarian regeneration.** (a) Heatmap shows ventralization in *bmp4* RNAi animals. (b) *bmp4* RNAi animals do not regenerate a blastema. No *laminB*<sup>+</sup> DVB epidermal cells are regenerated after *bmp4* RNAi (5/7). Occasionally, a new anterior pole forms at a new DVB patch of cells facilitating formation of eye cells in *bmp4* RNAi animals (2/7). Posterior poles form asymmetrically at the pre-existing DVB in *bmp4* RNAi animals. Data are representative of two independent experiments. (c) Occasionally a new anterior pole forms asymmetrically at the pre-existing DVB of a tail fragment after *bmp4* RNAi, facilitating the nucleation of eye cells and pharynx. Data are representative of at least two independent experiments. (d) Anterior pole forms in trunk fragments (right) and occasionally in tail fragments (left) of *bmp4* RNAi animals but only asymmetrically. Data are representative of two independent experiments. Blue arrows, pre-existing midline. Dotted yellow line marks amputation plane. Box in the cartoon shows the location of the image taken. Dotted box, zoom in area. Scale bars, 100  $\mu$ m.

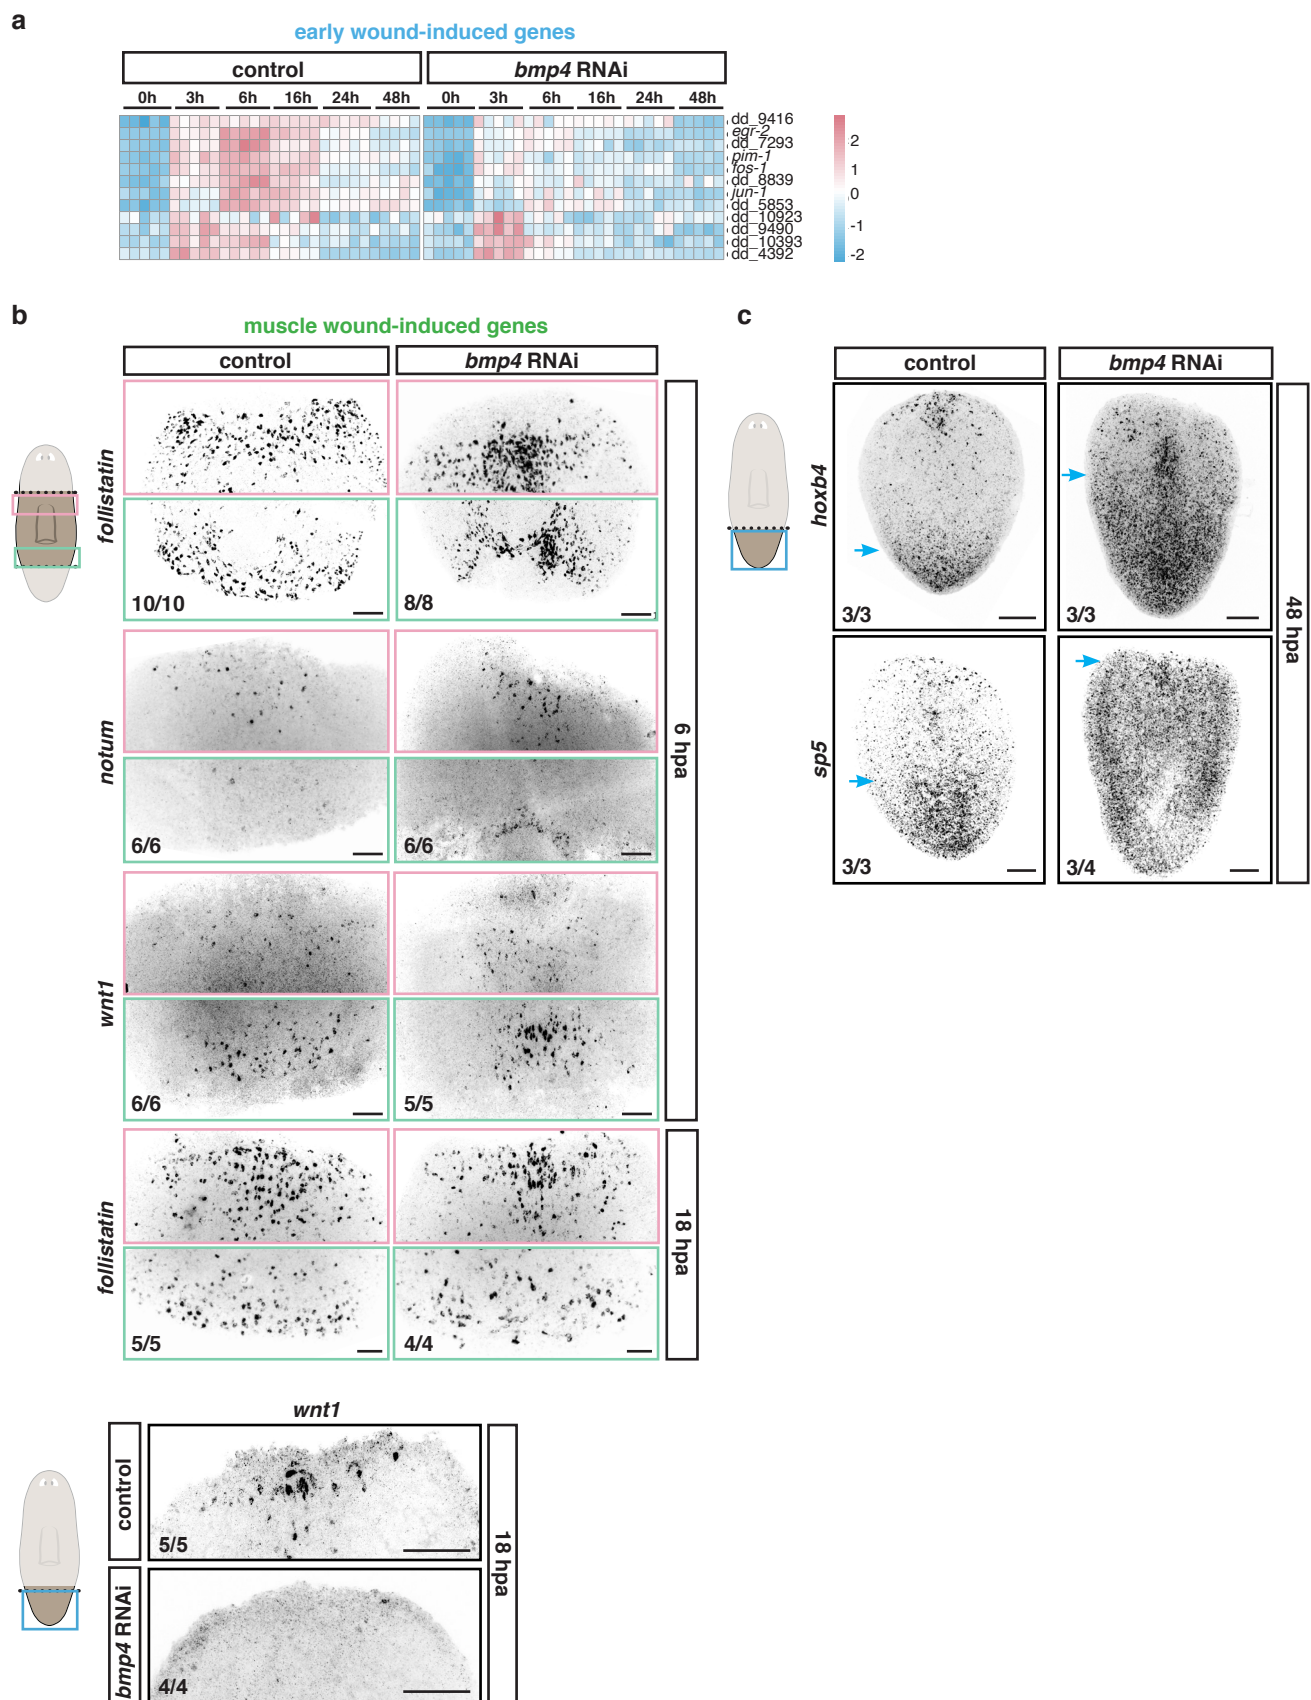

Figure S2

**Supplementary Figure 2. *bmp4* is required for maintenance of wound-induced gene expression and PCG rescaling.** (a) Heatmap shows activation of early wound-induced genes in *bmp4* RNAi animals. (b) Activation but not maintenance of wound-induced gene expression in *bmp4* RNAi animals. (c) No rescaling of posterior PCGs in regenerating tail fragments after *bmp4* RNAi. Data shown in (b, c) are representative of two independent experiments. Blue arrows, anterior expression edge of the posterior PCG. Box in the cartoon shows the location of the image taken. Scale bars, 100  $\mu$ m.

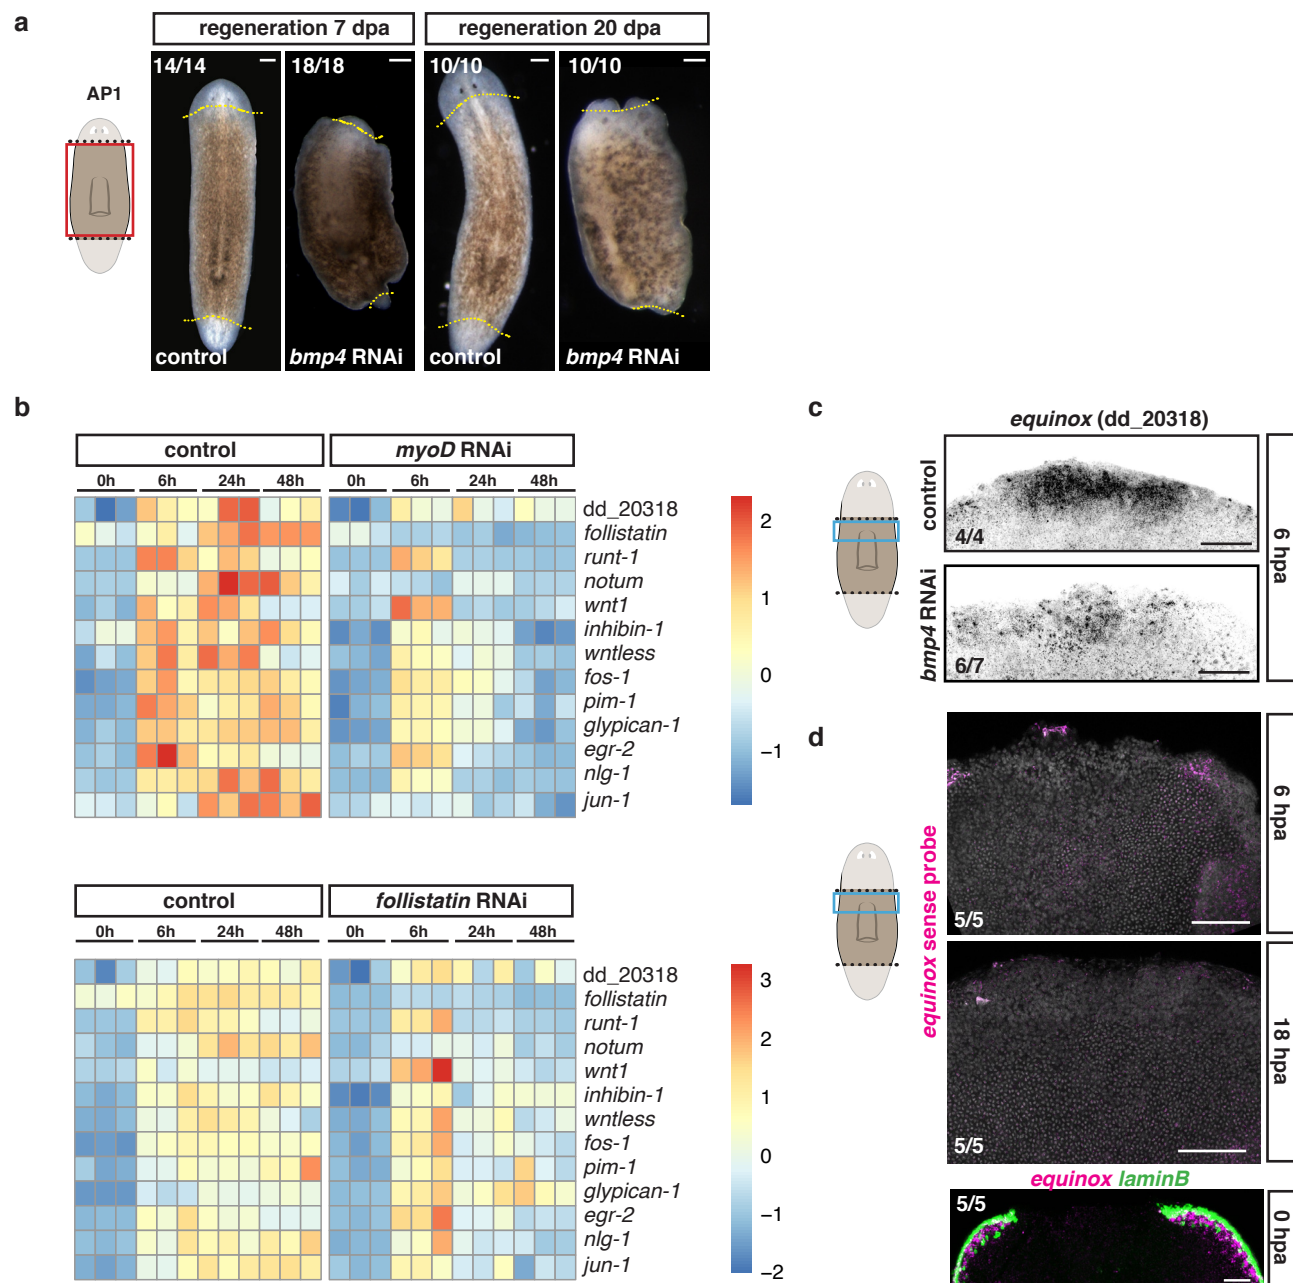

Figure S3

**Supplementary Figure 3. Expression of wound-induced *equinox* is inhibited in *bmp4* but not in *myoD* or *folliculin* RNAi.** (a) No regeneration of *bmp4* RNAi animals after AP1 cuts. Dotted yellow line marks amputation plane. (b) Heatmaps show wound-induced gene expression in *myoD* and *folliculin* RNAi animals. (c) Wound-induced *equinox* expression is not activated after *bmp4* RNAi (top). (d) Control expression of *equinox* after wounding. Sense probe for *equinox* does not show wound-induced expression following amputation (top). No *equinox* expression is detected at 0 hpa. Results shown in (a, c, and d) are representative of two independent experiments. Scale bars, 100  $\mu$ m.

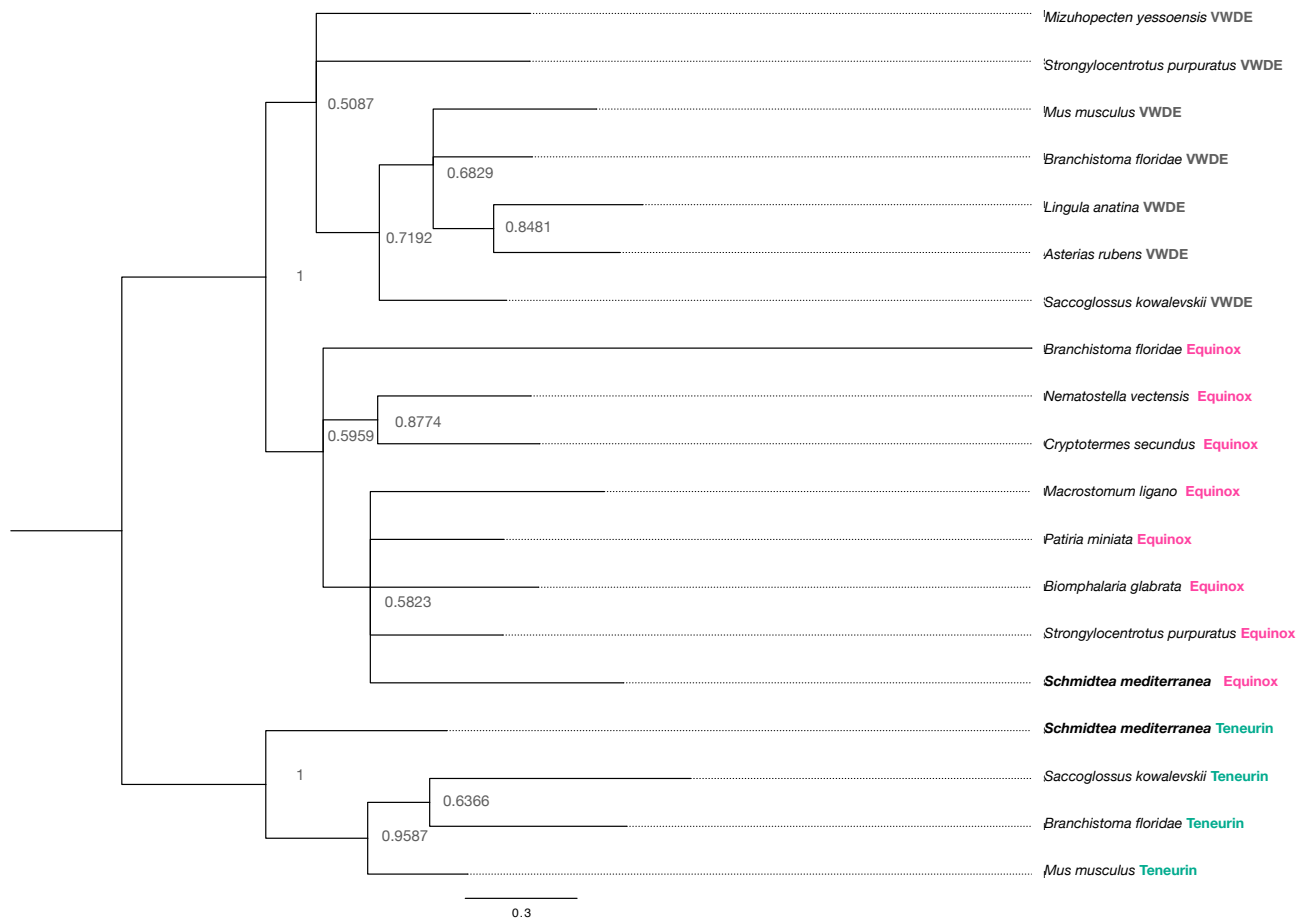

Figure S4

**Supplementary Figure 4. Phylogenetic tree for Equinox and VWDE.** Phylogenetic tree for the placement of *Schmidtea mediterranea* Equinox. Bayesian analysis of the EGF domain containing portion of proteins. This tree compares Equinox to best blast hit VWDE, where Teneurin is used as an outgroup across species. Percent posterior probability is indicated at nodes. Protein sequences are provided in Supplementary Table 2.

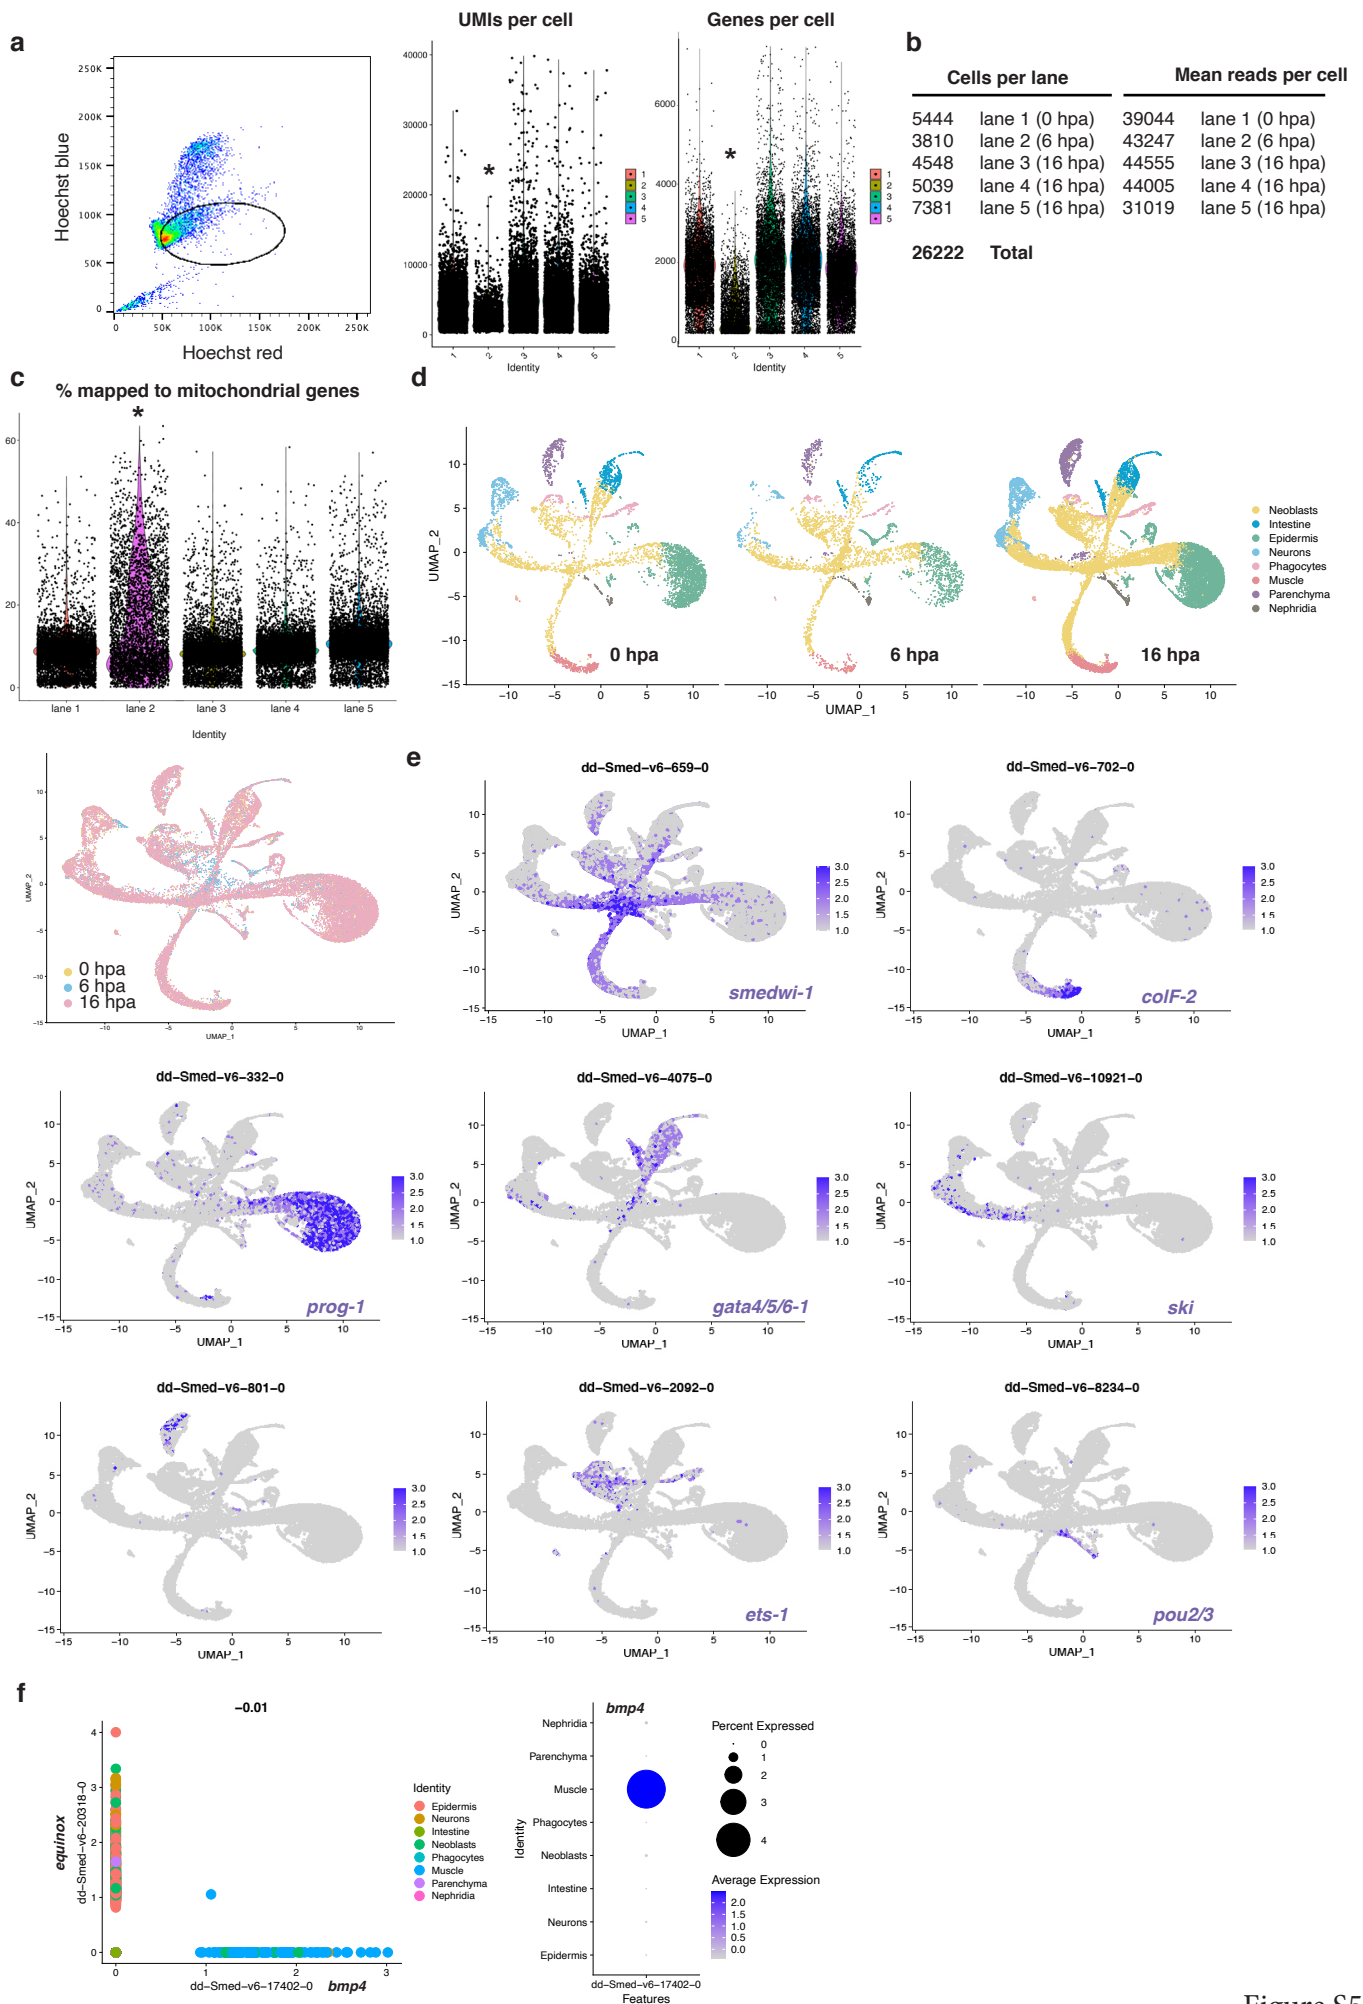

Figure S5

**Supplementary Figure 5. *equinox* is expressed in epidermal cells.** (a) Graphs show number of UMIs (left) and genes (right) per cell in each of the sequencing lanes. \*, lane 2 cells from an early wounded time point were sorted including calcein intermediate assuming some wounded cells might have a compromised membrane. Likely for this reason the overall quality of lane 2 cells was lower (see part c). (b) Tables show total number of cells per lane, and mean reads per cell. (c) Violin plots show percentage of mapping to mitochondrial genes. \*, lane 2 cells from an early wounded time point were sorted including calcein intermediate assuming wounded cells might have compromised membrane. Likely for this reason, cells displayed higher percentage of reads that mapped to mitochondrial genes, reflecting more permeable cells. Despite this caveat, these cells still displayed non overlapping cell type-specific gene expression and were utilized for data analysis that was validated by FISH. (d) UMAP plot shows the distribution of cells from each time point (left). UMAP plot shows contribution of cells to different clusters per time point (right). (e) UMAP plots show expression of specific tissue markers: *smadwi-1*, neoblasts; *prog-1*, epidermal progenitors; *colF-2*, muscle; *gata4/5/6-1*, intestine; *ets-1*, phagocytes; dd\_801 (no match), parenchymal cells; *pou2/3*, protonephridia; *ski*, neurons. (f) No correlation between *bmp4* and *equinox* expression.

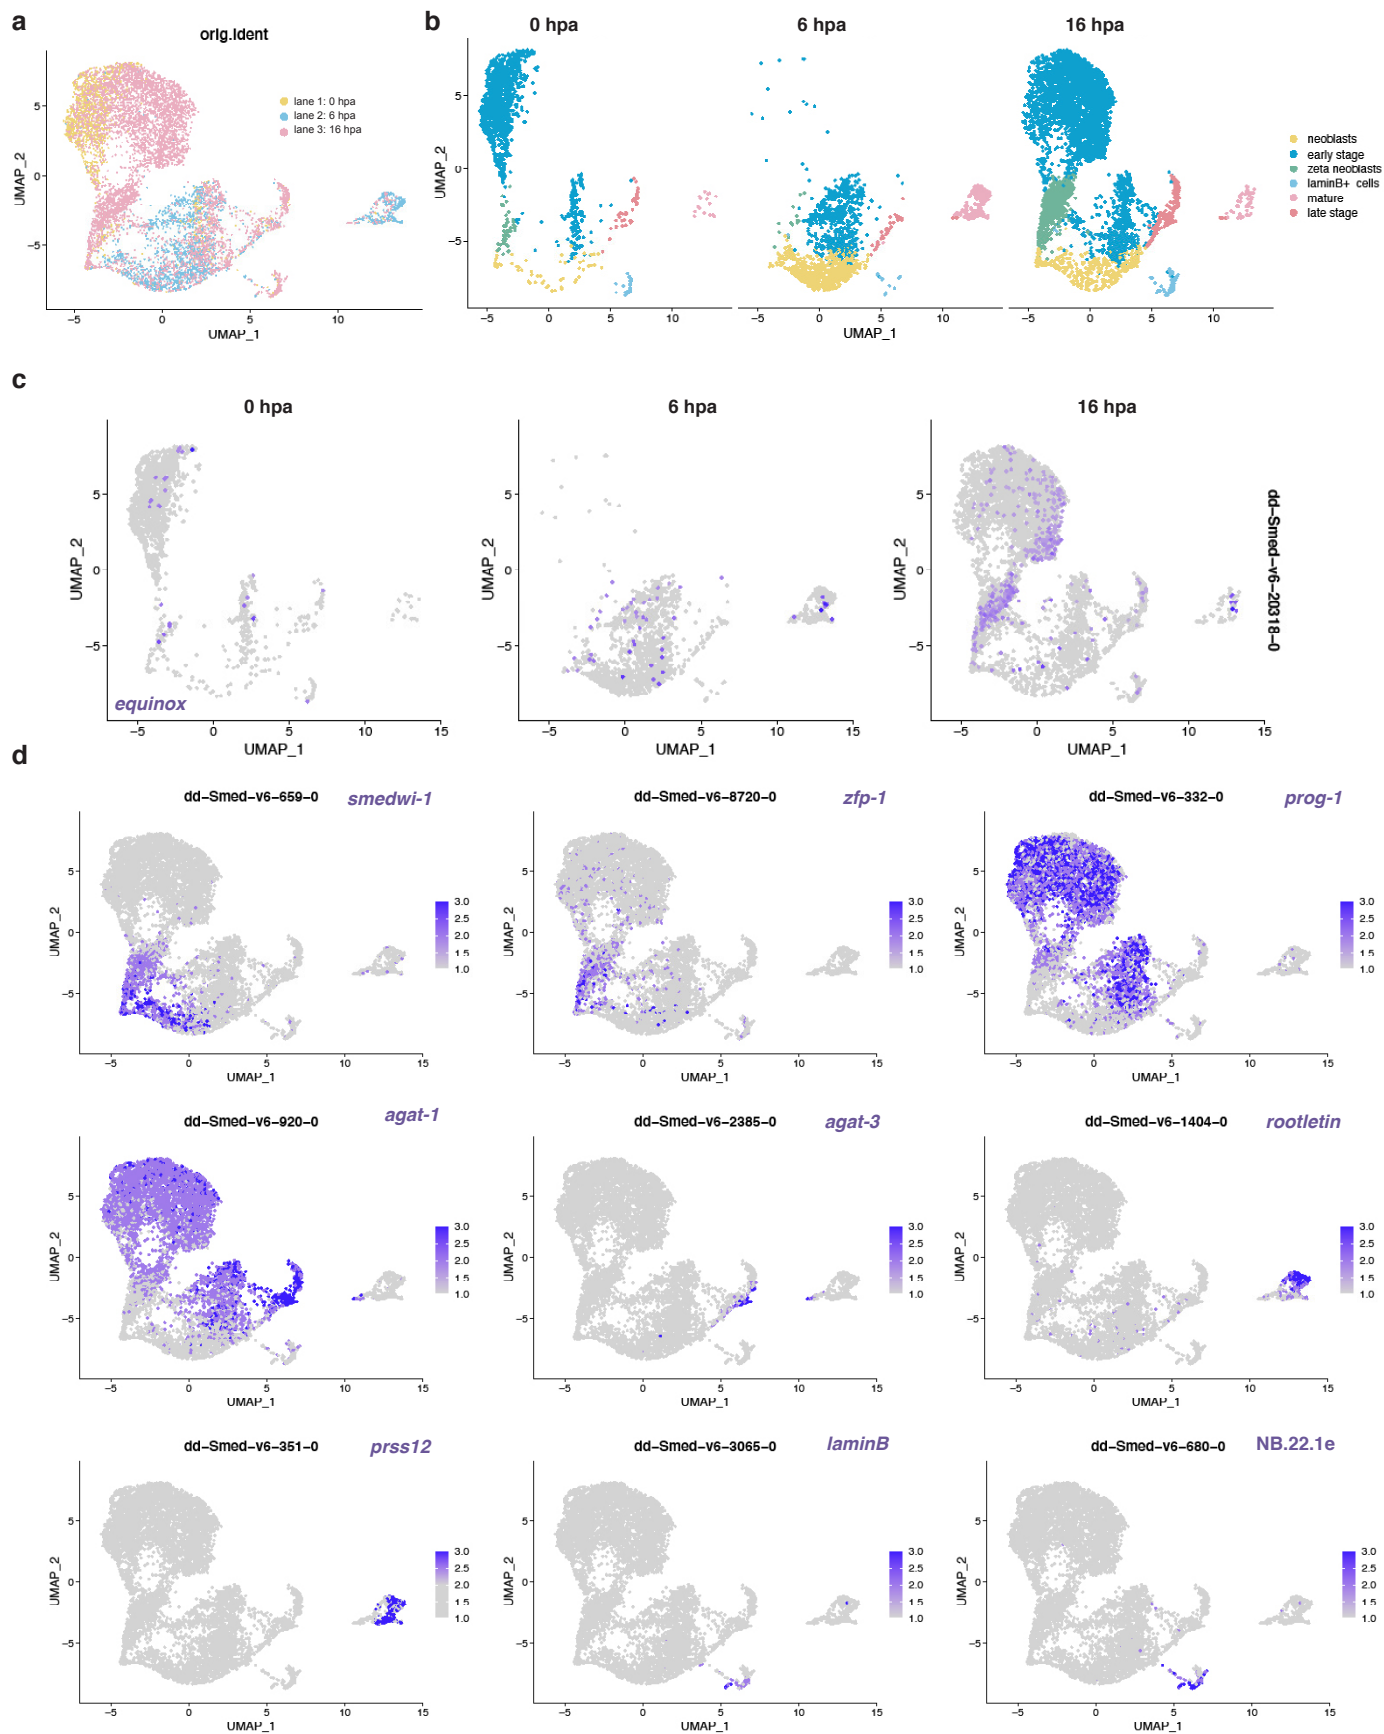

Figure S6

**Supplementary Figure 6. All different stages through the epidermal differentiation lineage are represented in the single-cell RNA sequencing data.** (a) UMAP plot shows distribution of cells along the epidermal differentiation pathway collected at different time points following amputation. (b) UMAP plot shows distribution of cells within the epidermal lineage from each time point. (c) UMAP plot shows *equinox* expression in each time point. (d) UMAP plots show expression of different epidermal differentiation markers: *smedwi-1*, neoblasts; *zfp-1*, zeta-neoblasts; *prog-1*, early progenitors; *agat-1*, early and late progenitors; *agat-3*, late progenitors; *rootletin*, mature epidermis; *prss12*, mature epidermis; *laminB*, mature DVB epidermis; NB.22.1e, mature DVB epidermis.

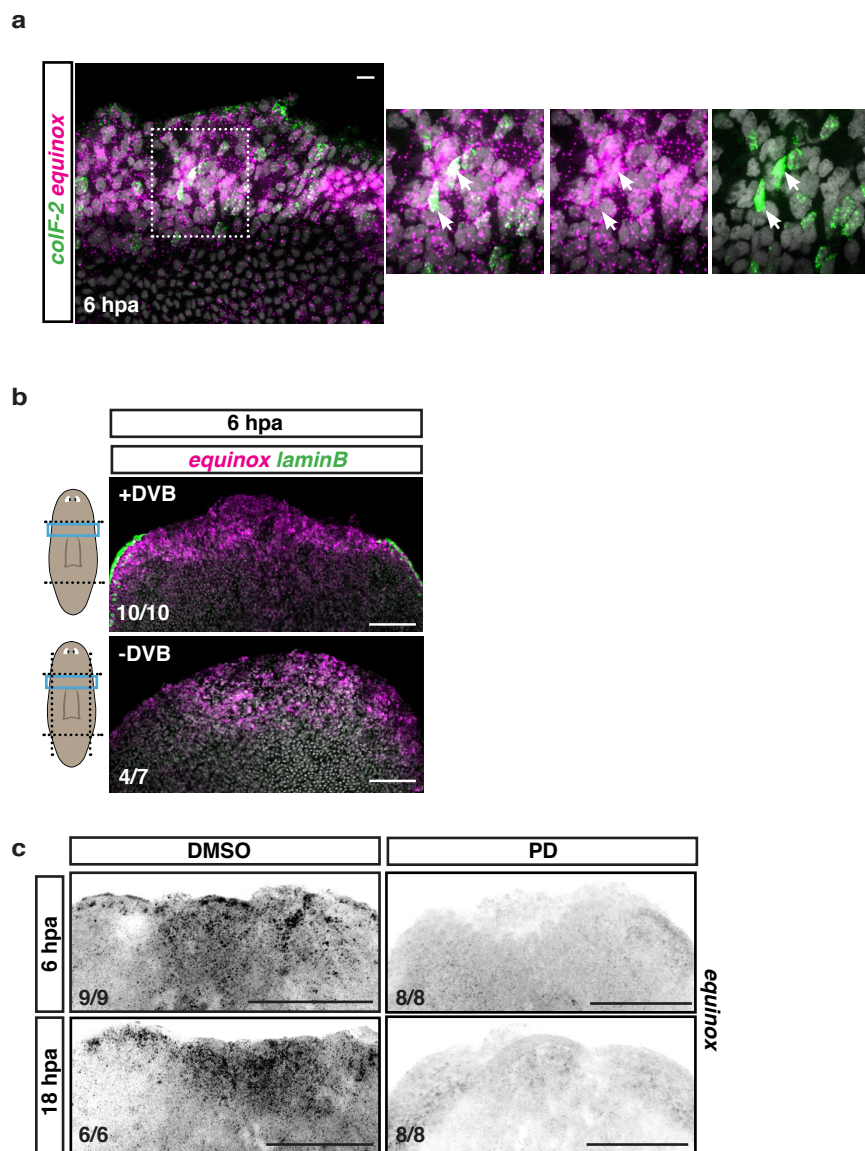

Figure S7

**Supplementary Figure 7. Wound-induced *equinox* cells are not only pre-existing DVB cells.** (a) Rare muscle cells expressed *equinox* following wounding at 6 hpa, n=2 independent experiments. (b) Wound-induced *equinox* expression is not the result of migration of DVB *equinox*<sup>+</sup> cells, n=3 independent experiments. (c) *equinox* expression at both 6 and 18 hpa is reduced following inhibition of Erk signaling, n=2 independent experiments. Scale bar, 100  $\mu$ m.

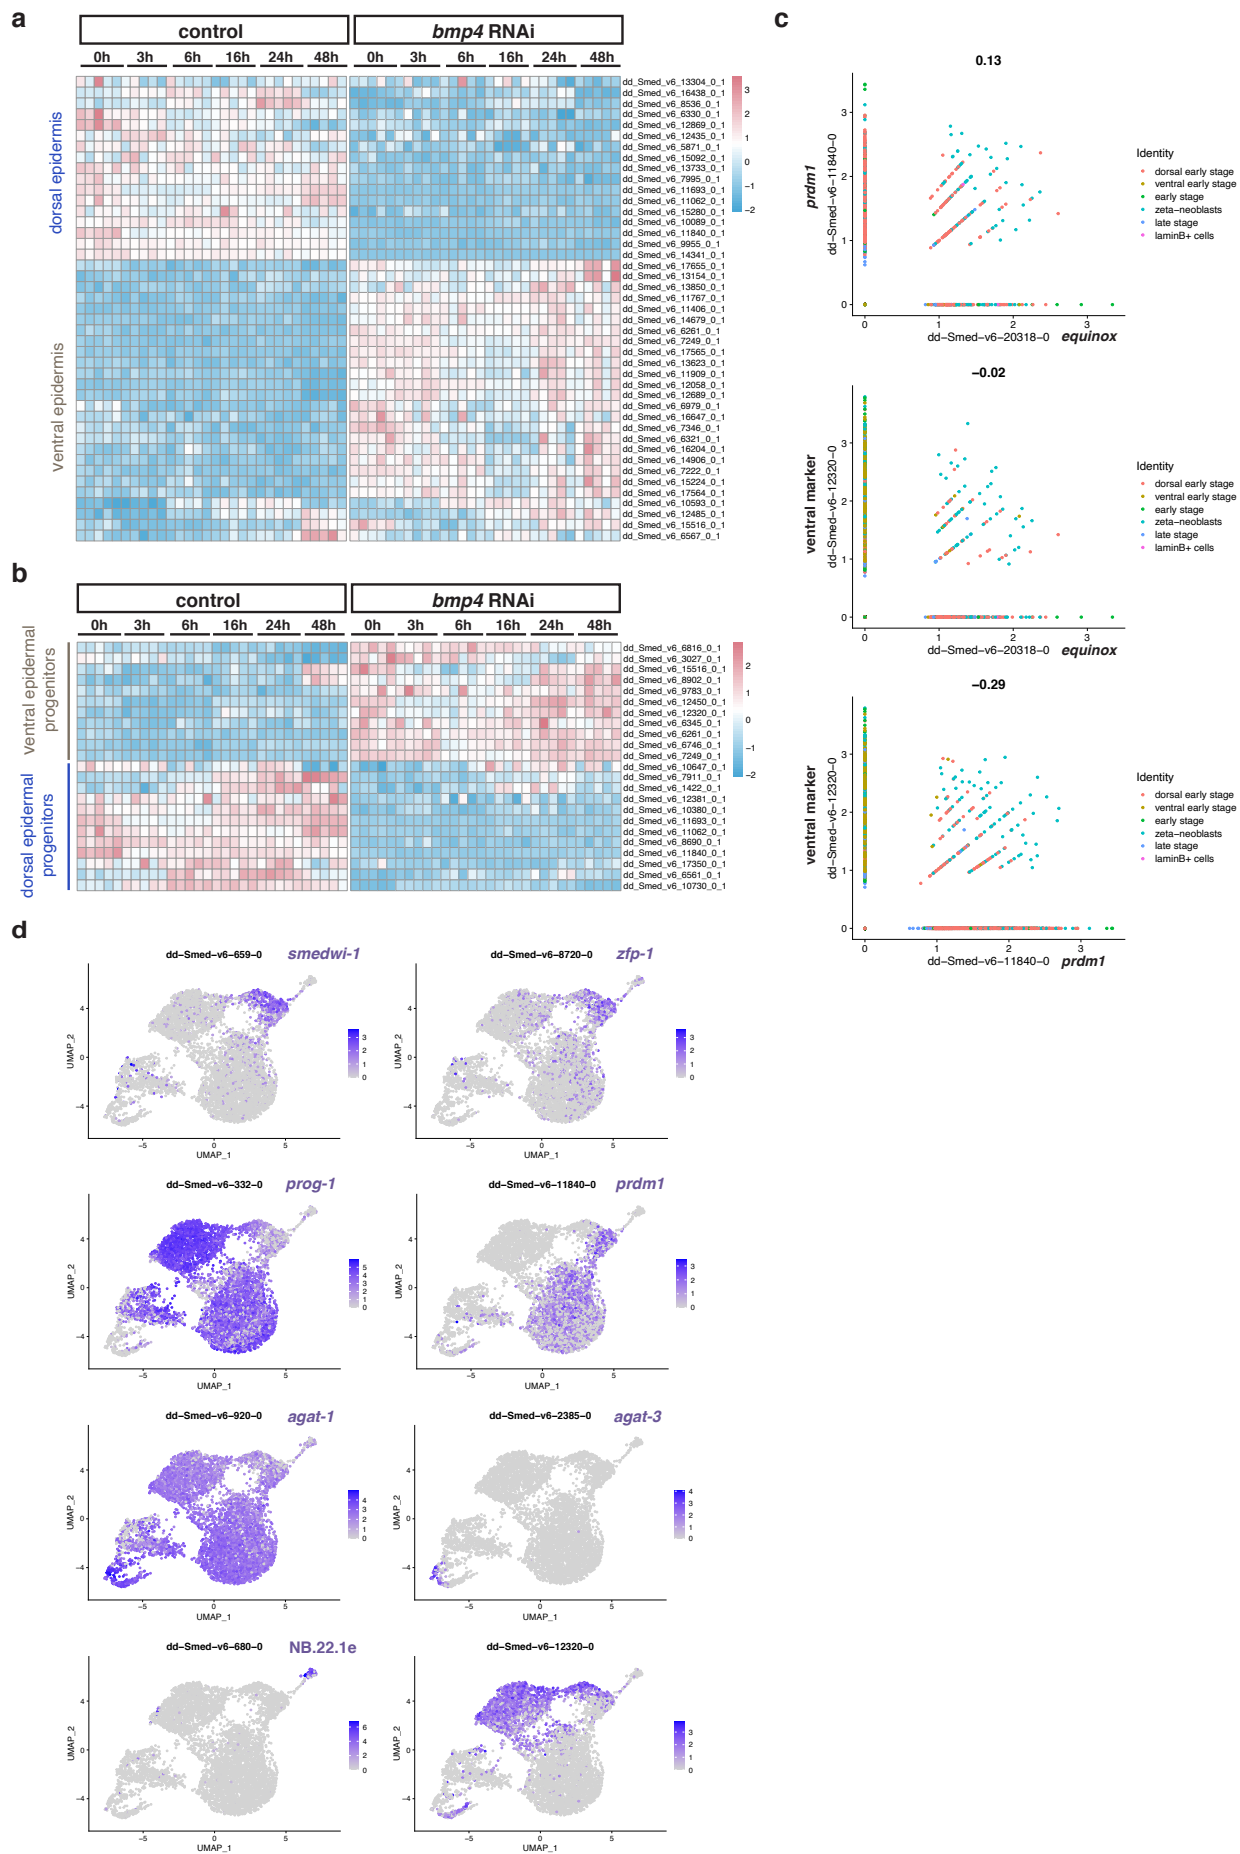

Figure S8

**Supplementary Figure 8. *equinox* is expressed in dorsal epidermal progenitors and these are decreased in *bmp4* RNAi animals.** (a) Heatmap shows decreased expression of dorsal epidermal markers and increased expression of ventral epidermal markers after *bmp4* RNAi. (b) Heatmap shows decreased expression of dorsal early epidermal progenitor markers and increased expression of ventral early epidermal progenitor markers after *bmp4* RNAi. (c) Correlation plots showing positive correlation between *equinox* and *prdm1* (dorsal epidermal progenitor marker) and negative correlation between *equinox* and the ventral early epidermal progenitor marker dd\_12320 (no match). (d) UMAP plots show expression of *smedwi-1*, neoblasts; *zfp-1*, zeta-neoblasts; *prog-1*, early progenitors; *prdm1*, dorsal early progenitors; dd\_12320, ventral early progenitors; *agat-1*, early and late progenitors; *agat-3*, late progenitors, and NB.22.1e, mature DVB epidermis. Scale bar, 100  $\mu$ m.

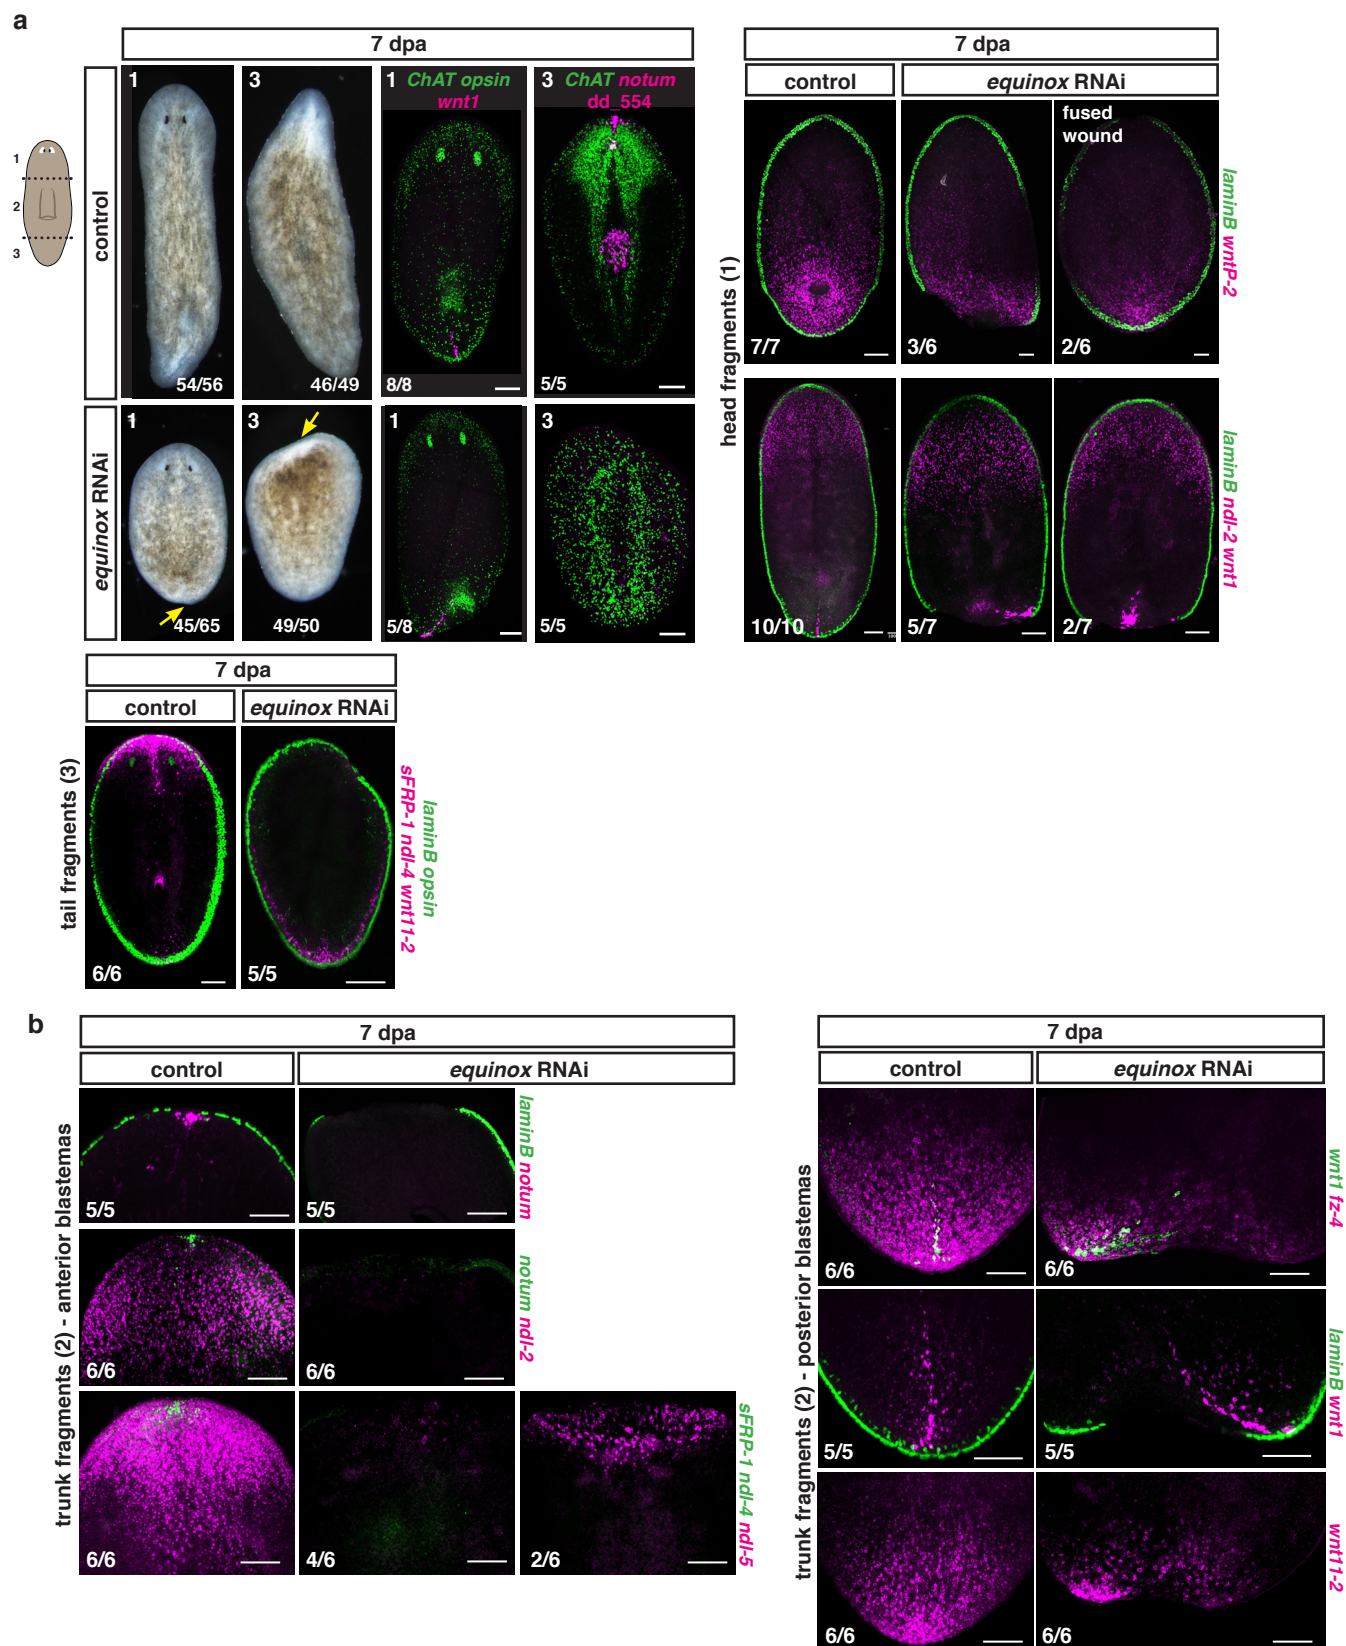

Figure S9

**Supplementary Figure 9. *equinox* is required for planarian regeneration.** (a) *equinox* RNAi head fragments do not form a blastema, but can form an asymmetric posterior pole. *equinox* RNAi tail fragments do not form a blastema, do not form an anterior pole, do not express anterior PCGs, and do not form anterior tissues. (b) *equinox* RNAi trunk fragments do not form anterior blastemas, do not express anterior PCGs, do not form a new anterior pole, or DVB. *equinox* RNAi trunk fragments do not form posterior blastemas but are able to regenerate an asymmetric posterior pole at the pre-existing DVB and express some posterior PCGs around the posterior pole. Live images are representative of seven independent experiments. FISH images are representative of two independent experiments. Scale bars, 100  $\mu$ m.

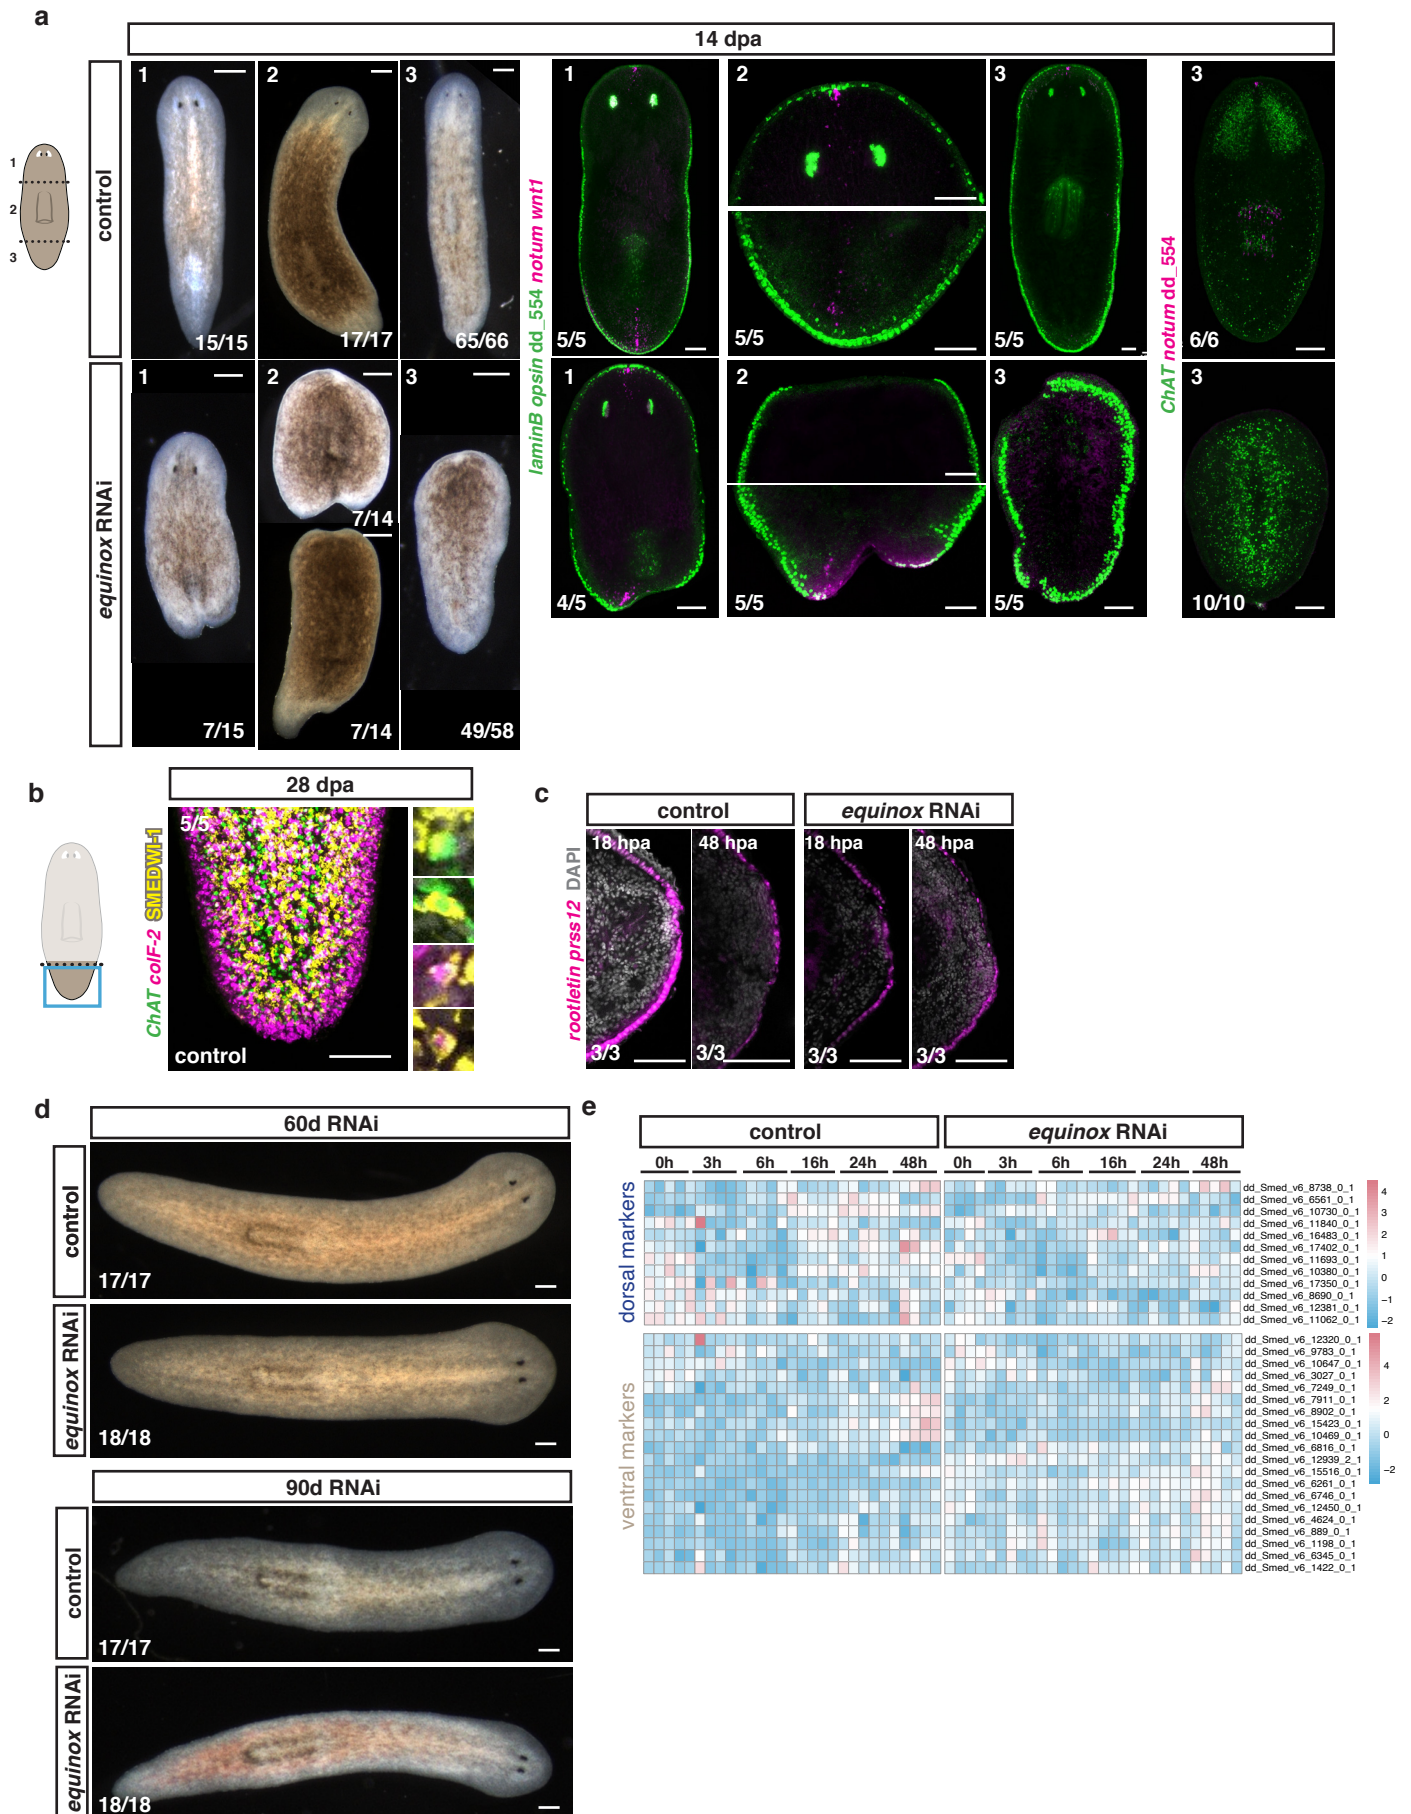

Figure S10

**Supplementary Figure 10. *equinox* is not required for normal homeostasis and does not affect the DV axis.** (a) 14 dpa blastemas are still not observed at anterior-facing wounds, but morphallaxis is observed at posterior-facing wounds associated with a new posterior pole in *equinox* RNAi animals. (b) Normal tissue turnover in control animals. (c) Epidermis covers the wound in *equinox* RNAi animals. (d) No defects are observed in long-term *equinox* RNAi animals. (e) Heatmap shows no ventralization after *equinox* RNAi. Live images are representative of three independent experiments. FISH images are representative of two independent experiments. Scale bars, 100  $\mu$ m.

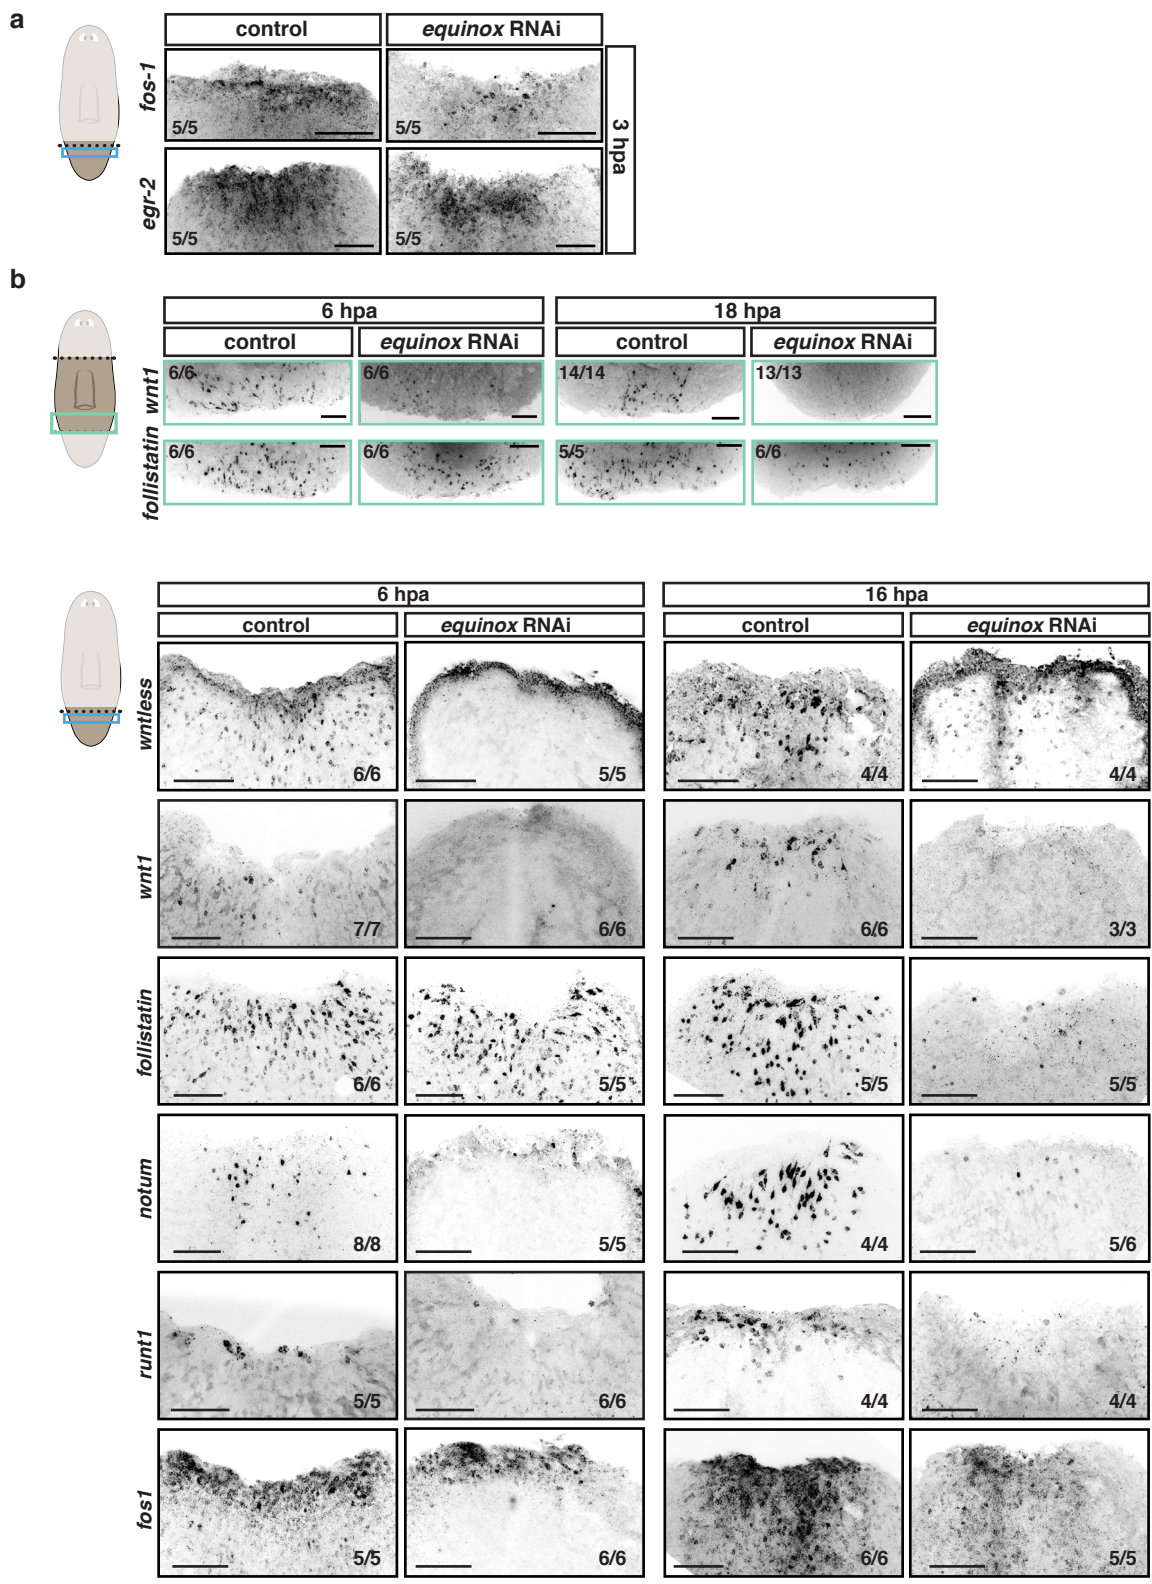

Figure S11

**Supplementary Figure 11. *equinox* is required for maintenance of wound-induced gene expression.** (a) Activation of early wound-induced genes but (b) failure to maintain muscle wound-induced gene expression in *equinox* RNAi animals. Images shown are representative of two independent experiments. Scale bars, 100  $\mu$ m.

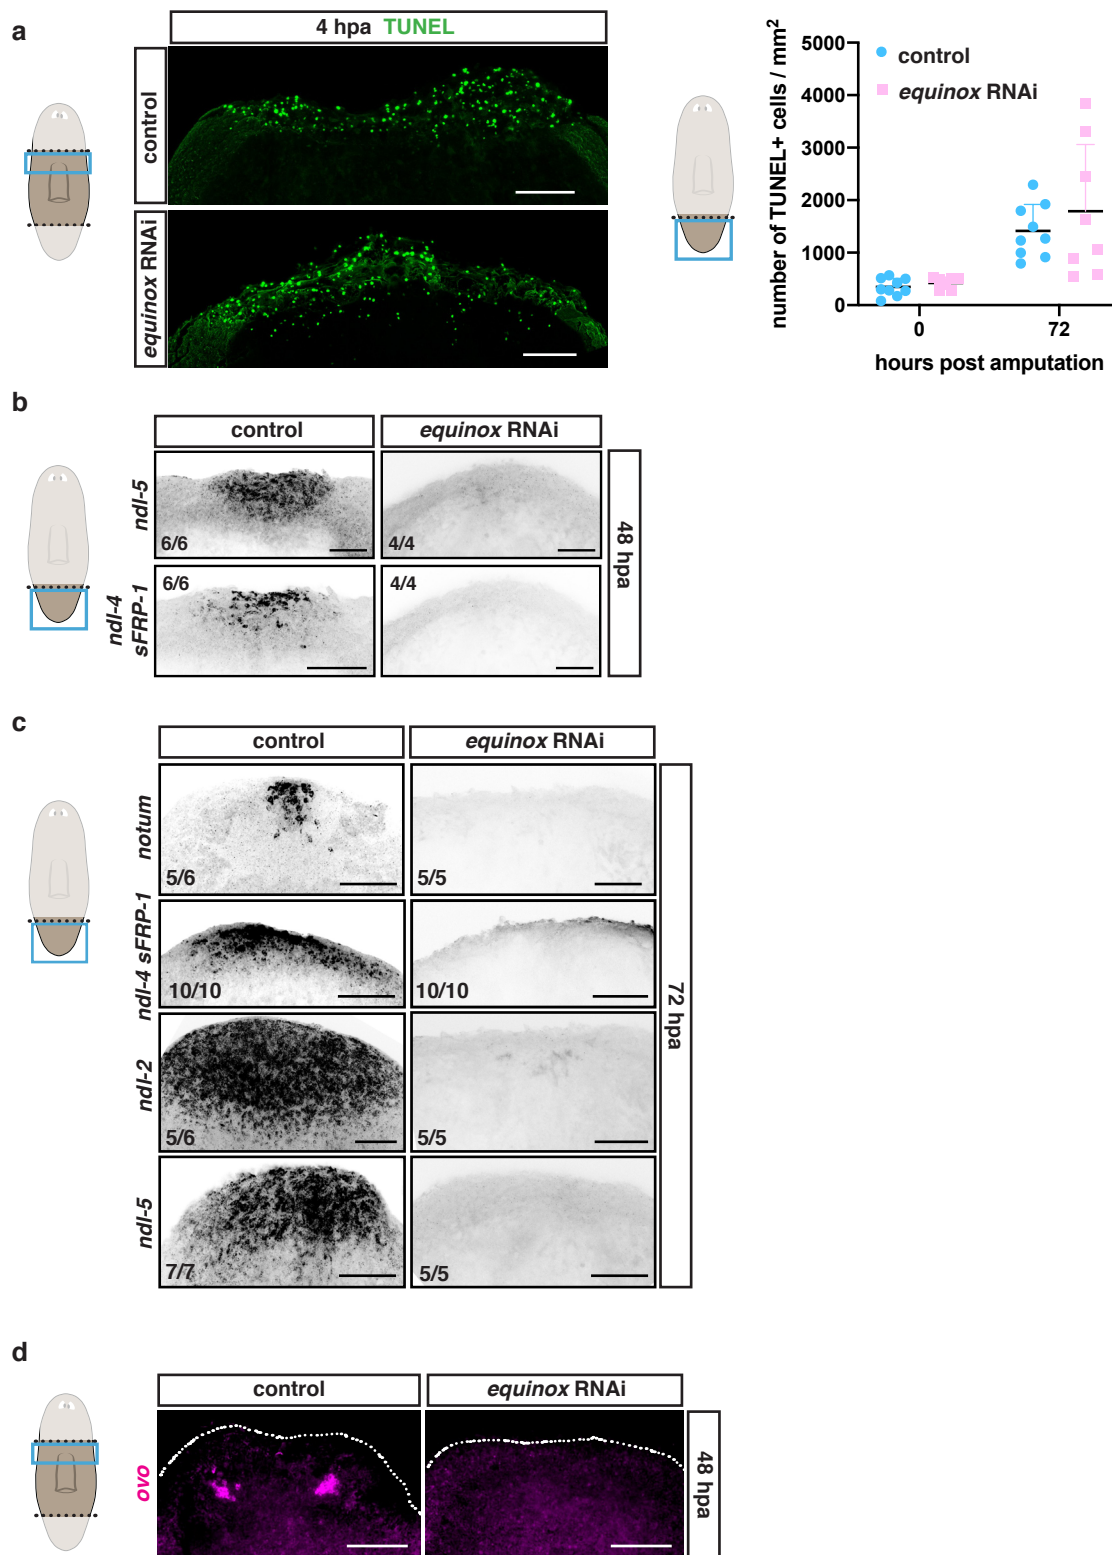

Figure S12

**Supplementary Figure 12. Normal apoptosis response but no PCG rescaling in *equinox* RNAi animals.** (a) *equinox* RNAi animals show similar numbers of TUNEL+ cells than control animals. (b, c) No expression of anterior PCGs after *equinox* RNAi at 48 hpa (b) or 72 hpa (c). For TUNEL experiments, n=9 independent animals for control 0 hpa and 72 hpa, and n=7 independent animals for *equinox* RNAi 0 hpa and n=8 for 72 hpa over one experiment. Data are presented as mean  $\pm$  SD and analyzed with unpaired Student's t test. (d) No differentiation of eye cells after *equinox* RNAi. All FISH images are representative of two independent experiments. Source data are provided as a Source Data file. Scale bars, 100  $\mu$ m.

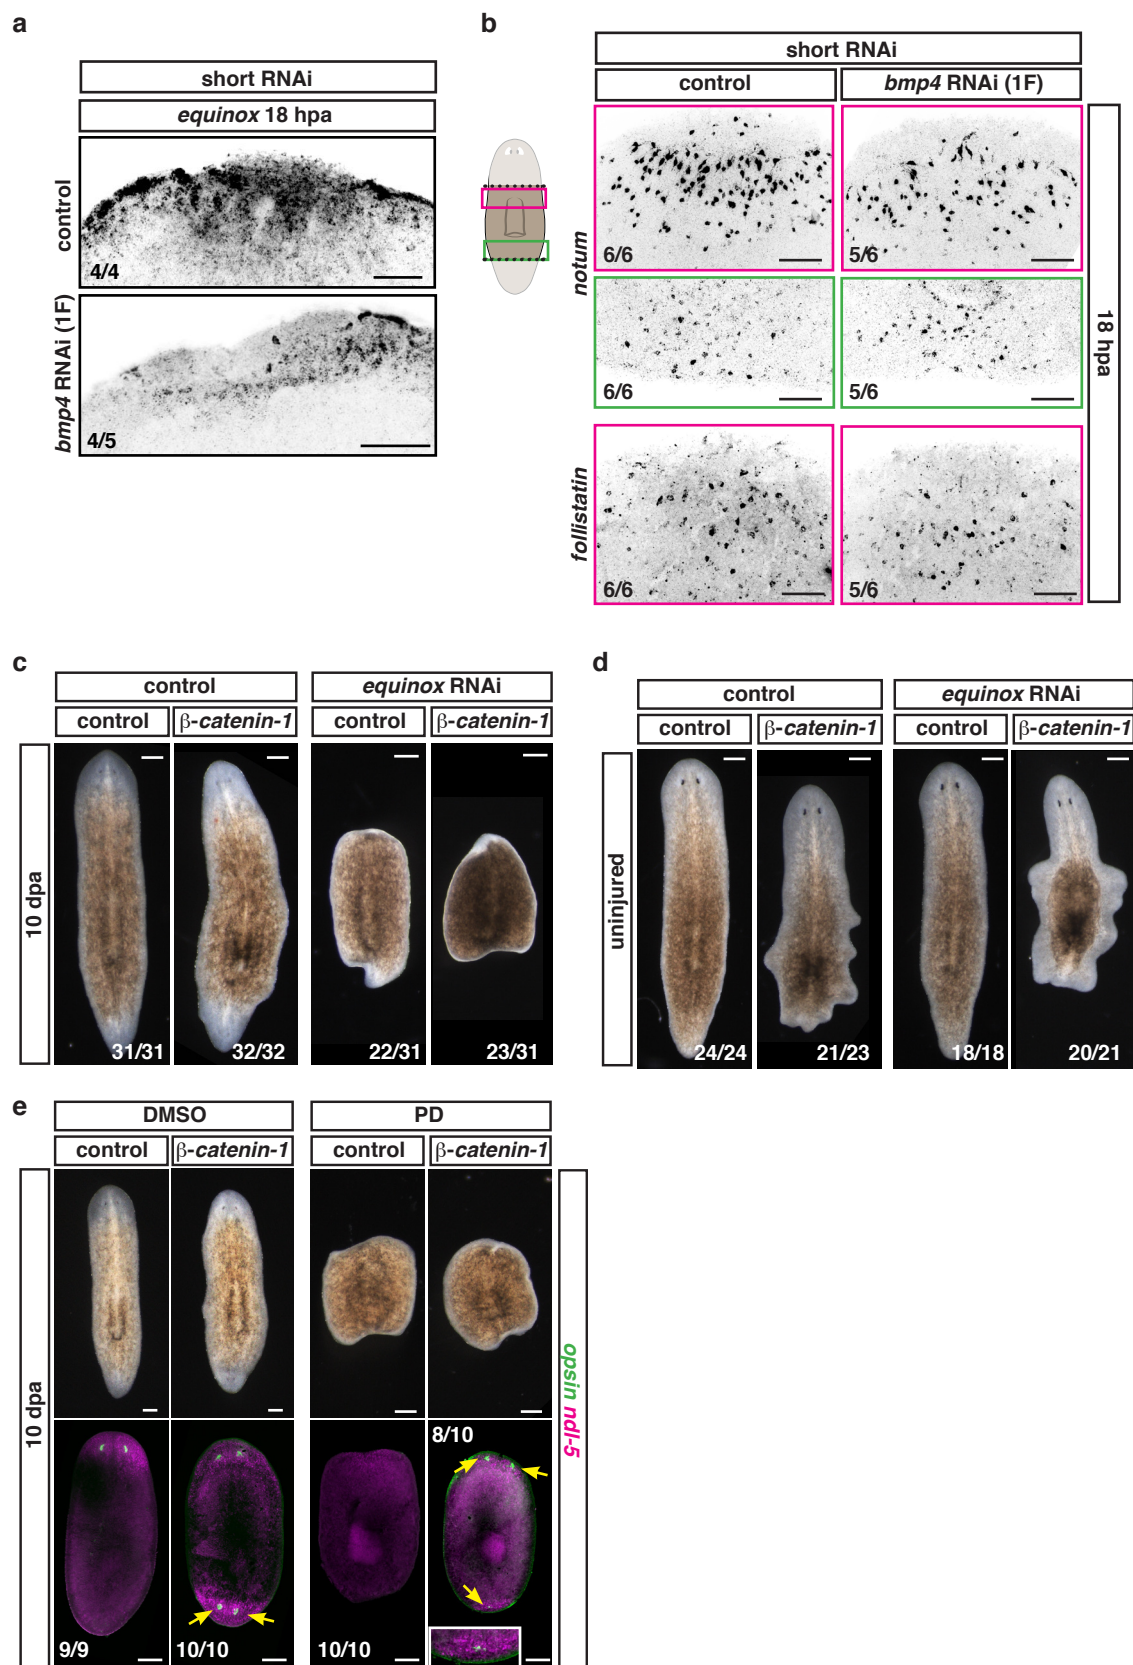

Figure S13

**Supplementary Figure 13. *equinox* is required for blastema formation.** Reduced expression of *equinox* (a) but normal wound-induced gene expression (b) at 18 hpa after only one *bmp4* RNAi feeding. (c) Inhibition of  $\beta$ -catenin-1 does not suppress lack of blastema formation in *equinox* RNAi animals, however, (d) peripheral ectopic heads can be observed after inhibition of both genes in uninjured animals. (e) Inhibition of Erk signaling inhibits blastema formation but not PCG rescaling and differentiation of anterior tissues in  $\beta$ -catenin-1 RNAi animals. Live images are representative of three independent experiments. FISH images are representative of two independent experiments.

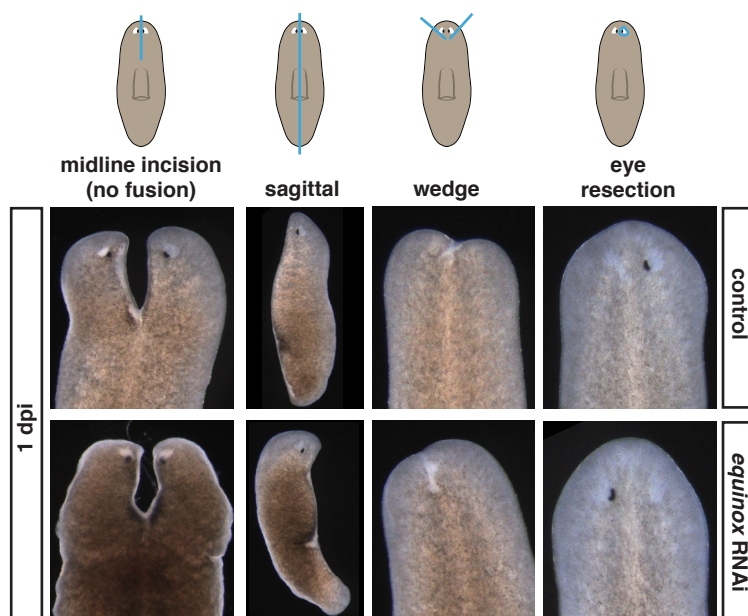

Figure S14

**Supplementary Figure 14. Normal healing of diverse injuries after *equinox* RNAi.** *equinox* and control RNAi animals look alike one day post-injury (dpi). Live images are representative of three independent experiments. Scale bars, 100  $\mu$ m.
